# Supplementary material
Source: HighWire-hosted journal article supplement (https://bmjopen.bmj.com/content/7/10/e016089)
Supplement: inline-supplementary-material-1 [file inline-supplementary-material-1.pdf]

**Supplementary Table A: Sample demographics**

|                             |                        | %     | n     |
|-----------------------------|------------------------|-------|-------|
| <b>Sex</b>                  | Male                   | 66.81 | 19934 |
|                             | Female                 | 33.19 | 9902  |
| <b>Age (years)</b>          | 18-24                  | 54.74 | 16333 |
|                             | 25-29                  | 29.31 | 8744  |
|                             | 30-34                  | 15.95 | 4759  |
| <b>Attended high school</b> | No                     | 1.58  | 471   |
|                             | Yes                    | 98.42 | 29365 |
| <b>AUDIT</b>                | Lower risk (0-7)       | 35.45 | 10577 |
|                             | Increasing risk (8-15) | 47.61 | 14205 |
|                             | Higher risk (16-19)    | 9.70  | 2895  |
|                             | Dependence (20+)       | 7.24  | 2159  |
| <b>Country of residence</b> | Australia              | 4.56  | 1360  |
|                             | Austria                | 2.95  | 880   |
|                             | Belgium                | 1.27  | 378   |
|                             | Brazil                 | 0.71  | 213   |
|                             | Canada                 | 1.57  | 468   |
|                             | Colombia               | 1.25  | 372   |
|                             | France                 | 4.95  | 1478  |
|                             | Germany                | 34.50 | 10294 |
|                             | Hungary                | 3.54  | 1055  |
|                             | Ireland                | 0.77  | 230   |
|                             | Italy                  | 4.25  | 1268  |
|                             | Mexico                 | 0.70  | 210   |
|                             | Netherlands            | 5.75  | 1715  |
|                             | New Zealand            | 4.56  | 1360  |
|                             | Norway                 | 2.62  | 782   |
|                             | Portugal               | 0.79  | 237   |
|                             | Spain                  | 2.32  | 692   |
|                             | Sweden                 | 1.05  | 312   |
|                             | Switzerland            | 7.47  | 2230  |
|                             | United Kingdom         | 8.73  | 2604  |
| United States               | 5.69                   | 1698  |       |

AUDIT, alcohol use disorders identification test

**Supplementary Table B: Logistic regression model<sup>¶</sup> for country of residence and relationships with emotions associated with drinking any type of alcohol<sup>€</sup>**

| Country                     | n    | Emotions associated with drinking any type of alcohol <sup>**</sup> |    |                   |    |                   |    |                   |    |                   |    |                   |                   |                   |                   |                   |                   |                   |    |
|-----------------------------|------|---------------------------------------------------------------------|----|-------------------|----|-------------------|----|-------------------|----|-------------------|----|-------------------|-------------------|-------------------|-------------------|-------------------|-------------------|-------------------|----|
|                             |      | Energised                                                           |    | Relaxed           |    | Sexy              |    | Confident         |    | Tired             |    | Aggressive        |                   | Ill               |                   | Restless          |                   | Tearful           |    |
|                             |      | AOR (95% CI)                                                        | p  | AOR (95% CI)      | p  | AOR (95% CI)      | p  | AOR (95% CI)      | p  | AOR (95% CI)      | p  | AOR (95% CI)      | p                 | AOR (95% CI)      | p                 | AOR (95% CI)      | p                 | AOR (95% CI)      | p  |
| United Kingdom <sup>‡</sup> | 2604 |                                                                     |    |                   |    |                   |    |                   |    |                   |    |                   |                   |                   |                   |                   |                   |                   |    |
|                             | 1029 |                                                                     | ** |                   | ** |                   | ** |                   | ** |                   | ** | **                | 0.219 (0.19-0.25) | **                | 0.788 (0.72-0.86) | **                | 0.811 (0.74-0.89) | **                |    |
| Germany                     | 4    | 0.392 (0.35-4.41)                                                   | *  | 0.716 (0.62-0.83) | *  | 0.799 (0.73-0.88) | *  | 0.480 (0.42-0.54) | *  | 0.797 (0.69-0.93) | ** | 0.691 (0.63-0.76) | *                 | 0.178 (0.15-0.21) | **                | 1.081 (0.96-1.22) | *                 | 0.579 (0.51-0.66) | ** |
| Switzerland                 | 2230 | 0.713 (0.62-0.83)                                                   | *  | 0.715 (0.60-0.86) | *  | 0.981 (0.87-1.11) | NS | 0.564 (0.49-0.66) | *  | 1.130 (0.92-1.39) | NS | 0.871 (0.77-0.99) | *                 | 0.783 (0.66-0.94) | **                | 0.748 (0.66-0.85) | **                | 0.644 (0.57-0.73) | ** |
| Netherlands                 | 1715 | 0.785 (0.66-0.93)                                                   | ** | 0.905 (0.73-1.12) | NS | 1.353 (1.18-156)  | *  | 0.739 (0.62-0.88) | ** | 0.651 (0.53-0.80) | *  | 0.646 (0.57-0.74) | *                 | 0.747 (0.63-0.89) | **                | 1.002 (0.88-1.14) | NS                | 1.114 (0.98-1.27) | NS |
| US                          | 1698 | 1.008 (0.85-1.20)                                                   | NS | 1.524 (1.20-1.93) | ** | 1.574 (1.37-1.81) | *  | 1.068 (0.89-1.28) | NS | 0.823 (0.67-1.01) | NS | 1.352 (1.19-1.54) | *                 | 0.874 (0.72-0.93) | **                | 1.089 (0.95-1.25) | NS                | 0.916 (0.80-0.95) | NS |
| New Zealand                 | 1360 | 0.904 (0.76-1.08)                                                   | NS | 1.337 (1.04-1.71) | *  | 1.016 (0.88-1.17) | NS | 1.064 (0.88-1.28) | NS | 0.550 (0.45-0.68) | *  | 0.896 (0.78-1.03) | NS                | 0.777 (0.65-0.93) | **                | 2.292 (2.01-2.62) | **                | 0.826 (0.72-0.95) | ** |
| France                      | 1478 | 0.958 (0.80-1.14)                                                   | NS | 0.934 (0.75-1.17) | NS | 0.881 (0.77-1.01) | NS | 0.617 (0.52-0.73) | *  | 0.360 (0.30-0.43) | *  | 0.936 (0.82-1.07) | NS                | 0.792 (0.66-0.95) | **                | 0.891 (0.78-1.02) | NS                | 0.904 (0.79-1.04) | NS |
| Australia                   | 1360 | 0.715 (0.60-0.85)                                                   | *  | 1.616 (1.24-2.11) | *  | 0.918 (0.80-1.06) | NS | 0.850 (0.71-1.02) | NS | 0.728 (0.59-0.90) | ** | 0.628 (0.54-0.73) | *                 | 0.756 (0.62-0.92) | **                | 0.576 (0.49-0.68) | **                | 0.728 (0.62-0.85) | ** |
| Hungary                     | 1055 | 0.886 (0.73-1.07)                                                   | NS | 0.346 (0.28-0.42) | *  | 1.198 (1.03-1.40) | *  | 0.682 (0.57-0.82) | *  | 0.438 (0.36-0.54) | *  | 0.882 (0.76-1.03) | NS                | 0.294 (0.25-0.35) | **                | 0.622 (0.54-0.72) | **                | 0.455 (0.39-0.53) | ** |
| Italy                       | 1268 | 0.885 (0.74-1.06)                                                   | NS | 0.551 (0.45-0.68) | *  | 0.898 (0.78-1.04) | NS | 0.393 (0.33-0.46) | *  | 0.319 (0.26-0.39) | *  | 1.089 (0.94-1.26) | NS                | 0.180 (0.15-0.22) | **                | 0.977 (0.82-1.16) | NS                | 0.670 (0.56-0.81) | *  |
| Spain                       | 692  | 1.018 (0.81-1.28)                                                   | NS | 0.453 (0.36-0.57) | *  | 0.861 (0.72-1.03) | NS | 0.886 (0.70-1.11) | NS | 0.432 (0.34-0.55) | *  | 0.813 (0.68-0.98) | *                 | 0.335 (0.26-0.43) | **                | 1.946 (1.56-2.43) | **                | 1.284 (1.02-1.61) | ** |
| Colombia                    | 372  | 2.404 (1.63-3.55)                                                   | *  | 1.481 (0.96-2.30) | NS | 2.339 (1.79-3.06) | *  | 1.044 (0.76-1.43) | NS | 0.558 (0.41-0.76) | *  | 0.937 (0.74-1.18) | NS                | 0.213 (0.18-0.26) | **                | 0.900 (0.77-1.06) | **                | 0.785 (0.67-0.93) | ** |
| Austria                     | 880  | 0.493 (0.41-0.59)                                                   | *  | 0.849 (0.66-1.09) | NS | 0.939 (0.80-1.11) | NS | 0.549 (0.45-0.67) | *  | 0.826 (0.64-1.06) | NS | 0.877 (0.74-1.03) | NS                | 1.169 (0.91-1.49) | **                | 1.889 (1.60-2.23) | **                | 1.222 (1.03-1.44) | ** |
| Norway                      | 782  | 1.919 (1.47-2.50)                                                   | *  | 2.106 (1.46-3.04) | *  | 1.470 (1.23-1.76) | *  | 1.100 (0.87-1.40) | NS | 0.850 (0.65-1.11) | NS | 1.358 (1.15-1.60) | *                 | 0.641 (0.49-0.83) | **                | 1.003 (0.82-1.23) | NS                | 0.951 (0.77-1.17) | *  |
| Canada                      | 468  | 1.043 (0.79-1.37)                                                   | NS | 1.781 (1.17-2.71) | ** | 1.256 (1.01-1.57) | *  | 0.806 (0.62-1.05) | NS | 0.529 (0.40-0.71) | *  | 1.105 (0.90-1.36) | NS                | 0.230 (0.17-0.31) | **                | 1.283 (0.96-1.71) | **                | 1.060 (0.79-1.42) | NS |
| Mexico                      | 210  | 1.134 (0.76-1.69)                                                   | NS | 1.647 (0.90-3.01) | NS | 1.423 (1.03-1.96) | *  | 0.901 (0.61-1.33) | NS | 0.390 (0.27-0.56) | *  | 1.150 (0.86-1.55) | NS                | 0.905 (0.66-1.24) | **                | 0.731 (0.58-0.92) | NS                | 0.700 (0.56-0.88) | NS |
| Belgium                     | 378  | 0.613 (0.47-0.80)                                                   | *  | 0.935 (0.64-1.36) | NS | 1.043 (0.83-1.32) | NS | 0.685 (0.51-0.91) | ** | 0.538 (0.39-0.74) | *  | 0.776 (0.62-0.98) | *                 | 0.751 (0.51-1.10) | NS                | 1.985 (1.49-2.64) | **                | 1.241 (0.93-1.66) | ** |
| Brazil                      | 213  | 0.995 (0.68-1.45)                                                   | NS | 2.375 (1.20-4.71) | *  | 3.943 (2.61-5.96) | *  | 1.189 (0.79-1.80) | NS | 0.702 (0.46-1.08) | NS | 1.173 (0.87-1.58) | NS                | 0.253 (0.19-0.34) | **                | 1.264 (0.96-1.66) | **                | 0.603 (0.45-0.81) | NS |
| Portugal                    | 237  | 0.848 (0.60-1.19)                                                   | NS | 0.659 (0.44-0.98) | *  | 1.079 (0.81-1.44) | NS | 0.514 (0.37-0.71) | *  | 0.395 (0.28-0.56) | *  | 0.608 (0.45-0.83) | **                | 1.068 (0.75-1.51) | **                | 1.409 (1.11-1.79) | NS                | 1.049 (0.82-1.34) | ** |
| Sweden                      | 312  | 1.481 (1.04-2.10)                                                   | *  | 2.078 (1.21-3.56) | ** | 1.127 (0.88-1.45) | NS | 0.886 (0.64-1.22) | NS | 1.041 (0.69-1.57) | NS | 0.851 (0.66-1.09) | NS                | 0.761 (0.52-1.11) | NS                | 1.212 (0.92-1.60) | NS                | 1.164 (0.88-1.54) | NS |
| Ireland                     | 230  | 1.411 (0.91-2.19)                                                   | NS | 0.795 (0.50-1.25) | NS | 0.809 (0.61-1.08) | NS | 0.547 (0.39-0.77) | ** | 0.711 (0.69-0.93) | NS | 1.038 (0.78-1.37) | NS                |                   | NS                |                   | NS                |                   | NS |

AOR, adjusted odds ratio; CI, confidence interval; NS, not significant.

\*p<0.05, \*\*p<0.01, \*\*\*p<0.001.

<sup>¶</sup>Country variable was included in the logistic regression model for Table 3 and has been included in separate supplementary table due to space restrictions.

<sup>€</sup>Emotions from drinking respondents reported regardless of the type of alcohol they associate it with. Includes emotions associated with spirits, white wine, red wine and beer.

<sup>‡</sup>reference category.

**Supplementary Table C: Bivariate relationship between emotions associated with drinking individual types of alcohol and AUDIT and socio-demographics (%)**

|                             |                        | n     | Positive emotions |         |         |           | Negative emotions |            |         |          |         |
|-----------------------------|------------------------|-------|-------------------|---------|---------|-----------|-------------------|------------|---------|----------|---------|
|                             |                        |       | Energised         | Relaxed | Sexy    | Confident | Tired             | Aggressive | Ill     | Restless | Tearful |
| <b>Spirits</b>              |                        |       |                   |         |         |           |                   |            |         |          |         |
| <b>AUDIT</b>                | Lower risk (0-7)       | 10577 | 45.49             | 19.72   | 33.69   | 48.54     | 17.37             | 16.70      | 43.53   | 20.65    | 15.26   |
|                             | Increasing risk (8-15) | 14205 | 62.73             | 19.64   | 45.05   | 62.22     | 14.24             | 32.64      | 49.28   | 29.45    | 23.20   |
|                             | Higher risk (16-19)    | 2895  | 70.92             | 21.49   | 52.54   | 71.16     | 14.68             | 45.35      | 52.82   | 35.13    | 30.95   |
|                             | Dependence (20+)       | 2159  | 75.82             | 23.85   | 54.24   | 73.83     | 13.34             | 54.93      | 52.62   | 42.33    | 38.40   |
|                             | $\chi^2$               |       | 1290.803          | 25.102  | 615.502 | 912.888   | 54.348            | 1908.209   | 139.037 | 593.266  | 758.589 |
|                             | p                      |       | ***               | ***     | ***     | ***       | ***               | ***        | ***     | ***      | ***     |
| <b>Sex</b>                  | Male                   | 19934 | 56.89             | 20.77   | 39.10   | 58.32     | 16.67             | 31.52      | 46.60   | 26.81    | 18.89   |
|                             | Female                 | 9902  | 61.37             | 18.91   | 49.09   | 60.59     | 12.62             | 26.43      | 50.29   | 29.82    | 28.97   |
|                             | $\chi^2$               |       | 55.222            | 14.350  | 270.432 | 14.118    | 83.462            | 82.042     | 36.181  | 29.830   | 388.839 |
|                             | p value                |       | ***               | ***     | ***     | ***       | ***               | ***        | ***     | ***      | ***     |
| <b>Age (years)</b>          | 18-24                  | 16333 | 64.02             | 19.06   | 46.44   | 63.77     | 14.73             | 29.82      | 48.82   | 29.95    | 23.66   |
|                             | 25-29                  | 8744  | 54.07             | 20.17   | 39.30   | 55.38     | 15.37             | 30.23      | 47.47   | 26.81    | 21.25   |
|                             | 30-34                  | 4759  | 46.84             | 23.87   | 34.33   | 49.78     | 17.29             | 29.14      | 45.07   | 22.34    | 19.16   |
|                             | $\chi^2$               |       | 541.325           | 53.009  | 270.366 | 368.307   | 18.666            | 1.724      | 21.304  | 112.493  | 50.157  |
|                             | p                      |       | ***               | ***     | ***     | ***       | ***               | NS         | ***     | ***      | ***     |
| <b>Attended high school</b> | Yes                    | 29365 | 58.20             | 20.03   | 42.33   | 58.89     | 15.27             | 29.70      | 47.73   | 27.80    | 22.07   |
|                             | No                     | 471   | 68.79             | 27.81   | 47.56   | 70.91     | 18.68             | 38.43      | 54.14   | 28.45    | 32.91   |
|                             | $\chi^2$               |       | 21.412            | 17.448  | 5.183   | 27.733    | 4.1540            | 16.8920    | 7.6490  | 0.0970   | 31.5090 |
|                             | p                      |       | ***               | ***     | *       | ***       | *                 | ***        | **      | NS       | ***     |
| <b>Red wine</b>             |                        |       |                   |         |         |           |                   |            |         |          |         |
| <b>AUDIT</b>                | Lower risk (0-7)       | 10577 | 5.56              | 50.23   | 20.85   | 23.22     | 58.70             | 1.47       | 14.67   | 3.97     | 11.62   |
|                             | Increasing risk (8-15) | 14205 | 7.32              | 54.04   | 26.45   | 29.06     | 60.63             | 2.44       | 19.91   | 5.00     | 18.16   |
|                             | Higher risk (16-19)    | 2895  | 8.74              | 54.51   | 30.78   | 32.88     | 61.97             | 4.46       | 26.39   | 7.53     | 23.77   |
|                             | Dependence (20+)       | 2159  | 11.49             | 54.93   | 30.85   | 36.27     | 60.63             | 6.25       | 28.30   | 9.17     | 28.02   |
|                             | $\chi^2$               |       | 113.324           | 44.051  | 202.364 | 235.632   | 14.711            | 209.963    | 354.627 | 134.965  | 507.751 |

|                             |                        |       |         |         |         |         |         |         |         |         |         |
|-----------------------------|------------------------|-------|---------|---------|---------|---------|---------|---------|---------|---------|---------|
|                             | p                      |       | ***     | ***     | ***     | ***     | **      | ***     | ***     | ***     | ***     |
| <b>Sex</b>                  | Male                   | 19934 | 7.62    | 50.61   | 22.12   | 26.29   | 55.52   | 2.47    | 18.15   | 5.07    | 13.62   |
|                             | Female                 | 9902  | 6.16    | 57.20   | 31.40   | 31.08   | 69.25   | 2.77    | 21.57   | 5.40    | 24.10   |
|                             | $\chi^2$               |       | 21.275  | 115.233 | 301.899 | 75.578  | 520.004 | 2.364   | 49.602  | 1.477   | 512.269 |
|                             | p                      |       | ***     | ***     | ***     | ***     | ***     | NS      | ***     | NS      | ***     |
| <b>Age (years)</b>          | 18-24                  | 16333 | 7.67    | 49.68   | 27.03   | 28.86   | 58.46   | 2.65    | 20.55   | 5.41    | 17.81   |
|                             | 25-29                  | 8744  | 6.62    | 55.90   | 24.10   | 27.52   | 62.42   | 2.36    | 18.00   | 5.24    | 16.94   |
|                             | 30-34                  | 4759  | 6.24    | 57.79   | 20.95   | 25.22   | 61.29   | 2.67    | 17.34   | 4.31    | 14.94   |
|                             | $\chi^2$               |       | 16.32   | 144.807 | 80.309  | 25.113  | 40.660  | 2.216   | 37.596  | 9.132   | 21.645  |
|                             | p                      |       | ***     | ***     | ***     | ***     | ***     | NS      | ***     | *       | ***     |
| <b>Attended high school</b> | Yes                    | 29365 | 7.11    | 52.79   | 25.07   | 27.79   | 60.17   | 2.56    | 19.23   | 5.14    | 17.03   |
|                             | No                     | 471   | 8.70    | 53.50   | 33.12   | 33.55   | 54.35   | 2.97    | 23.14   | 7.86    | 21.23   |
|                             | $\chi^2$               |       | 1.778   | 0.095   | 15.924  | 7.633   | 6.534   | 0.314   | 4.565   | 6.964   | 5.772   |
|                             | p                      |       | NS      | NS      | ***     | **      | *       | NS      | *       | **      | *       |
| <b>White wine</b>           |                        |       |         |         |         |         |         |         |         |         |         |
| <b>AUDIT</b>                | Lower risk (0-7)       | 10577 | 11.55   | 31.70   | 19.38   | 22.72   | 19.08   | 1.43    | 10.28   | 4.76    | 6.44    |
|                             | Increasing risk (8-15) | 14205 | 16.11   | 32.81   | 25.11   | 30.14   | 17.67   | 2.77    | 15.19   | 6.33    | 10.22   |
|                             | Higher risk (16-19)    | 2895  | 18.58   | 34.44   | 28.77   | 33.85   | 19.69   | 4.49    | 20.00   | 9.50    | 14.89   |
|                             | Dependence (20+)       | 2159  | 20.70   | 34.14   | 29.13   | 35.62   | 16.67   | 6.62    | 23.25   | 11.21   | 18.94   |
|                             | $\chi^2$               |       | 195.650 | 10.862  | 201.011 | 287.306 | 11.553  | 223.999 | 361.664 | 176.759 | 419.873 |
|                             | p                      |       | ***     | *       | ***     | ***     | **      | ***     | ***     | ***     | ***     |
| <b>Sex</b>                  | Male                   | 19934 | 12.82   | 28.21   | 18.29   | 24.04   | 16.51   | 2.60    | 13.21   | 6.06    | 6.85    |
|                             | Female                 | 9902  | 19.58   | 41.65   | 34.67   | 36.78   | 22.32   | 3.01    | 17.09   | 7.18    | 16.23   |
|                             | $\chi^2$               |       | 236.235 | 543.290 | 980.770 | 529.645 | 148.465 | 4.093   | 80.084  | 13.799  | 648.311 |
|                             | p                      |       | ***     | ***     | ***     | ***     | ***     | *       | ***     | ***     | ***     |
| <b>Age (years)</b>          | 18-24                  | 16333 | 15.67   | 34.68   | 25.98   | 29.76   | 20.98   | 2.45    | 15.49   | 6.23    | 11.62   |
|                             | 25-29                  | 8744  | 14.67   | 31.08   | 22.42   | 27.57   | 15.95   | 2.80    | 13.53   | 6.62    | 8.46    |
|                             | 30-34                  | 4759  | 13.72   | 28.68   | 18.39   | 24.44   | 14.29   | 3.61    | 12.88   | 6.77    | 7.04    |
|                             | $\chi^2$               |       | 12.40   | 74.345  | 129.206 | 54.339  | 160.325 | 18.973  | 29.626  | 2.483   | 117.299 |
|                             | p                      |       | **      | ***     | ***     | ***     | ***     | ***     | ***     | NS      | ***     |

|                             |                        |       |         |         |         |         |         |         |         |         |         |
|-----------------------------|------------------------|-------|---------|---------|---------|---------|---------|---------|---------|---------|---------|
| <b>Attended high school</b> | Yes                    | 29365 | 15.04   | 32.60   | 23.66   | 28.19   | 18.37   | 2.72    | 14.44   | 6.38    | 9.90    |
|                             | No                     | 471   | 16.56   | 37.15   | 27.60   | 32.91   | 22.72   | 3.61    | 18.47   | 9.77    | 14.01   |
|                             | $\chi^2$               |       | 0.836   | 4.379   | 3.970   | 5.083   | 5.830   | 1.363   | 6.090   | 8.842   | 8.742   |
|                             | p                      |       | NS      | *       | *       | *       | *       | NS      | *       | **      | **      |
| <b>Beer</b>                 |                        |       |         |         |         |         |         |         |         |         |         |
| <b>AUDIT</b>                | Lower risk (0-7)       | 10577 | 18.17   | 43.18   | 14.19   | 34.93   | 37.21   | 3.91    | 15.27   | 6.66    | 6.60    |
|                             | Increasing risk (8-15) | 14205 | 26.93   | 52.42   | 20.56   | 47.98   | 39.10   | 6.98    | 17.04   | 9.57    | 10.35   |
|                             | Higher risk (16-19)    | 2895  | 31.47   | 55.54   | 24.21   | 54.75   | 41.52   | 10.67   | 18.55   | 12.54   | 13.96   |
|                             | Dependence (20+)       | 2159  | 33.67   | 58.22   | 23.44   | 55.21   | 42.57   | 13.52   | 19.08   | 16.67   | 17.46   |
|                             | $\chi^2$               |       | 444.546 | 323.844 | 261.117 | 684.950 | 33.464  | 365.745 | 32.689  | 263.021 | 324.623 |
| p                           |                        | ***   | ***     | ***     | ***     | ***     | ***     | ***     | ***     | ***     | ***     |
| <b>Sex</b>                  | Male                   | 19934 | 26.16   | 54.67   | 20.58   | 47.94   | 41.74   | 7.60    | 14.55   | 9.43    | 9.99    |
|                             | Female                 | 9902  | 21.93   | 40.19   | 15.40   | 37.69   | 33.23   | 4.97    | 21.05   | 9.16    | 9.67    |
|                             | $\chi^2$               |       | 63.290  | 554.585 | 116.075 | 281.321 | 201.887 | 73.010  | 200.433 | 0.575   | 0.728   |
|                             | p                      |       | ***     | ***     | ***     | ***     | ***     | ***     | ***     | NS      | NS      |
| <b>Age (years)</b>          | 18-24                  | 16333 | 26.77   | 52.09   | 20.36   | 47.88   | 39.58   | 7.41    | 17.41   | 10.08   | 10.39   |
|                             | 25-29                  | 8744  | 23.25   | 47.93   | 17.91   | 42.22   | 38.85   | 5.92    | 16.55   | 8.81    | 9.71    |
|                             | 30-34                  | 4759  | 20.61   | 45.79   | 15.49   | 37.30   | 36.75   | 5.86    | 14.58   | 7.77    | 8.47    |
|                             | $\chi^2$               |       | 89.98   | 77.123  | 64.484  | 194.018 | 12.448  | 26.736  | 21.430  | 27.385  | 15.704  |
|                             | p                      |       | ***     | ***     | ***     | ***     | **      | ***     | ***     | ***     | ***     |
| <b>Attended high school</b> | Yes                    | 29365 | 24.66   | 49.83   | 18.83   | 44.38   | 38.79   | 6.69    | 16.63   | 9.30    | 9.83    |
|                             | No                     | 471   | 30.57   | 52.02   | 21.23   | 54.56   | 46.92   | 9.13    | 21.66   | 11.89   | 13.16   |
|                             | $\chi^2$               |       | 8.696   | 0.886   | 1.754   | 19.482  | 12.901  | 4.403   | 8.4190  | 3.6700  | 5.7780  |
|                             | p                      |       | **      | NS      | NS      | ***     | ***     | *       | **      | NS      | *       |

AUDIT, alcohol use disorders identification test; NS, not significant.

\*p<0.05, \*\*p<0.01, \*\*\*p<0.001.

Supplementary Table D: Logistic regression model<sup>¶</sup> for age, educational attainment and country of residence and relationships with emotions associated with each individual drink type

|                 |                                         |             |                   | Emotions associated with individual drink type |                   |                   |                   |                   |                   |                   |                   |                   |                   |                   |                   |                   |                   |                   |                   |                   |     |
|-----------------|-----------------------------------------|-------------|-------------------|------------------------------------------------|-------------------|-------------------|-------------------|-------------------|-------------------|-------------------|-------------------|-------------------|-------------------|-------------------|-------------------|-------------------|-------------------|-------------------|-------------------|-------------------|-----|
|                 |                                         |             |                   | Energised                                      |                   | Relaxed           |                   | Sexy              |                   | Confident         |                   | Tired             |                   | Aggressive        |                   | Ill               |                   | Restless          |                   | Tearful           |     |
| n               |                                         |             |                   | AOR (95% CI)                                   | p                 | AOR (95% CI)      | p                 | AOR (95% CI)      | p                 | AOR (95% CI)      | p                 | AOR (95% CI)      | p                 | AOR (95% CI)      | p                 | AOR (95% CI)      | p                 | AOR (95% CI)      | p                 | AOR (95% CI)      | p   |
| <b>Spirits</b>  | <b>Age (years)<sup>€</sup></b>          | 25-29       | 8744              | 0.722 (0.68-0.76)                              | ***               | 1.167 (1.09-1.25) | ***               | 0.804 (0.76-0.85) | ***               | 0.765 (0.72-0.81) | ***               | 1.043 (0.97-1.12) | NS                | 1.119 (1.05-1.19) | ***               | 1.02 (0.97-1.08)  | NS                | 0.909 (0.86-0.97) | **                | 0.96 (0.90-1.02)  | NS  |
|                 |                                         | 30-34       | 4759              | 0.533 (0.50-0.57)                              | ***               | 1.355 (1.25-1.47) | ***               | 0.668 (0.62-0.72) | ***               | 0.607 (0.57-0.65) | ***               | 1.166 (1.07-1.27) | **                | 1.125 (1.04-1.21) | **                | 0.947 (0.89-1.01) | NS                | 0.735 (0.68-0.80) | ***               | 0.883 (0.81-0.96) | **  |
|                 | <b>Attended high school<sup>¥</sup></b> | Yes         | 29365             | 0.909 (0.74-1.12)                              | NS                | 0.822 (0.67-1.02) | NS                | 1.03 (0.85-1.25)  | NS                | 0.817 (0.66-1.01) | NS                | 0.849 (0.67-1.08) | NS                | 0.87 (0.71-1.06)  | NS                | 1.004 (0.83-1.22) | NS                | 1.126 (0.91-1.39) | NS                | 0.676 (0.55-0.83) | *** |
|                 |                                         |             |                   |                                                |                   |                   |                   |                   |                   |                   |                   |                   |                   |                   |                   |                   |                   |                   |                   |                   |     |
|                 | <b>Country<sup>†</sup></b>              | Germany     | 10294             | 0.330 (0.30-0.37)                              | ***               | 0.544 (0.49-0.61) | ***               | 0.727 (0.67-0.80) | NS                | 0.482 (0.44-0.53) | ***               | 1.456 (1.27-1.67) | ***               | 0.989 (0.90-1.09) | NS                | 0.871 (0.80-0.95) | **                | 0.824 (0.75-0.91) | ***               | 0.667 (0.60-0.74) | *** |
|                 |                                         | Switzerland | 2230              | 0.488 (0.43-0.55)                              | ***               | 0.760 (0.66-0.88) | ***               | 0.921 (0.82-1.04) | ***               | 0.538 (0.48-0.61) | ***               | 1.046 (0.87-1.26) | NS                | 0.918 (0.80-1.05) | NS                | 0.614 (0.55-0.69) | ***               | 0.898 (0.79-1.02) | NS                | 0.500 (0.47-0.64) | *** |
|                 |                                         | Netherlands | 1715              | 0.443 (0.39-0.51)                              | ***               | 1.631 (1.42-1.88) | ***               | 0.917 (0.81-1.04) | NS                | 0.625 (0.55-0.71) | ***               | 2.050 (1.72-2.45) | ***               | 0.761 (0.66-0.88) | ***               | 1.719 (0.52-0.95) | ***               | 0.728 (0.63-0.84) | ***               | 0.724 (0.63-0.84) | *** |
|                 |                                         | US          | 1698              | 0.984 (0.85-1.14)                              | NS                | 1.791 (1.56-2.06) | ***               | 1.600 (1.41-1.82) | *                 | 1.263 (1.10-1.46) | **                | 1.798 (1.51-2.15) | ***               | 1.917 (1.68-2.19) | ***               | 1.778 (1.57-2.01) | ***               | 0.980 (0.86-1.12) | NS                | 1.232 (1.07-1.41) | **  |
|                 |                                         | New Zealand | 1360              | 0.690 (0.60-0.80)                              | ***               | 1.624 (1.40-1.89) | ***               | 0.975 (0.85-1.12) | NS                | 0.940 (0.81-1.09) | NS                | 1.531 (1.26-1.86) | ***               | 1.104 (0.95-1.28) | NS                | 1.200 (1.05-1.67) | **                | 0.932 (0.80-1.08) | NS                | 1.229 (1.06-1.43) | **  |
|                 |                                         | France      | 1478              | 0.711 (0.62-0.82)                              | ***               | 1.550 (1.34-1.79) | ***               | 0.876 (0.77-1.00) | NS                | 0.626 (0.55-0.72) | ***               | 2.510 (2.11-2.99) | ***               | 1.200 (1.04-1.38) | *                 | 1.814 (1.59-2.07) | ***               | 2.502 (2.19-2.86) | ***               | 1.094 (0.95-1.26) | NS  |
|                 |                                         | Australia   | 1360              | 0.648 (0.56-0.75)                              | ***               | 1.619 (1.40-1.88) | ***               | 0.945 (0.83-1.08) | ***               | 0.798 (0.69-0.92) | **                | 1.324 (1.08-1.62) | **                | 0.793 (0.68-0.92) | **                | 0.974 (0.85-1.11) | NS                | 0.742 (0.64-0.86) | ***               | 0.912 (0.78-1.06) | NS  |
|                 |                                         | Hungary     | 1055              | 0.622 (0.53-0.73)                              | ***               | 0.485 (0.39-0.60) | ***               | 0.996 (0.86-1.15) | NS                | 0.622 (0.53-0.72) | ***               | 1.789 (1.46-2.19) | ***               | 1.198 (1.02-1.41) | *                 | 2.029 (1.75-2.35) | ***               | 0.533 (0.45-0.64) | ***               | 0.603 (0.50-0.73) | *** |
|                 |                                         | Italy       | 1268              | 0.627 (0.54-0.73)                              | ***               | 0.623 (0.52-0.75) | ***               | 0.730 (0.63-0.84) | ***               | 0.359 (0.31-0.41) | ***               | 1.557 (1.28-1.90) | ***               | 1.335 (1.15-1.55) | ***               | 1.223 (1.07-1.40) | **                | 0.661 (0.56-0.78) | ***               | 0.500 (0.42-0.60) | *** |
|                 |                                         | Spain       | 692               | 0.851 (0.70-1.03)                              | NS                | 0.825 (0.67-1.02) | NS                | 1.069 (0.90-1.27) | **                | 1.040 (0.86-1.26) | NS                | 1.663 (1.31-2.10) | ***               | 1.136 (0.94-1.37) | NS                | 0.714 (0.60-0.85) | ***               | 1.133 (0.94-1.36) | NS                | 0.848 (0.69-1.04) | NS  |
|                 |                                         | Colombia    | 372               | 1.556 (1.18-2.05)                              | **                | 1.035 (0.80-1.34) | NS                | 1.823 (1.46-2.28) | *                 | 1.050 (0.82-1.34) | NS                | 1.236 (0.89-1.71) | NS                | 1.285 (1.02-1.63) | *                 | 1.014 (0.82-1.26) | NS                | 1.921 (1.54-2.40) | ***               | 1.487 (1.78-1.88) | **  |
|                 |                                         | Austria     | 880               | 0.340 (0.29-0.40)                              | ***               | 0.412 (0.32-0.52) | ***               | 0.764 (0.65-0.90) | NS                | 0.467 (0.40-0.55) | ***               | 0.904 (0.70-1.17) | NS                | 1.238 (1.04-1.47) | *                 | 0.773 (0.66-0.90) | **                | 0.820 (0.69-0.98) | *                 | 0.585 (0.48-0.71) | *** |
|                 |                                         | Norway      | 782               | 0.843 (0.70-1.01)                              | NS                | 0.712 (0.58-0.88) | **                | 0.843 (0.72-0.99) | NS                | 0.746 (0.63-0.89) | **                | 1.748 (1.40-2.19) | ***               | 2.086 (1.76-2.47) | ***               | 2.227 (1.88-2.63) | ***               | 1.865 (1.58-2.20) | ***               | 1.243 (1.04-1.48) | *   |
|                 |                                         | Canada      | 468               | 0.952 (0.76-1.20)                              | NS                | 1.676 (1.35-2.08) | ***               | 1.096 (0.90-1.34) | NS                | 0.863 (0.70-1.07) | NS                | 1.718 (1.31-2.26) | ***               | 1.506 (1.22-1.86) | ***               | 1.360 (1.12-1.66) | **                | 0.998 (0.80-1.24) | NS                | 0.951 (0.76-1.19) | NS  |
|                 |                                         | Mexico      | 210               | 0.768 (0.56-1.05)                              | NS                | 2.073 (1.54-2.79) | ***               | 1.279 (0.96-1.70) | ***               | 0.743 (0.55-1.00) | NS                | 1.721 (1.18-2.52) | ***               | 1.415 (1.05-1.91) | *                 | 0.651 (0.49-0.87) | **                | 1.118 (0.83-1.51) | NS                | 1.134 (0.83-1.56) | NS  |
|                 |                                         | Belgium     | 378               | 0.506 (0.40-0.64)                              | ***               | 1.458 (1.14-1.86) | **                | 0.841 (0.67-1.05) | NS                | 0.596 (0.48-0.75) | ***               | 1.602 (1.18-2.17) | **                | 1.025 (0.81-1.30) | NS                | 1.664 (1.34-2.07) | ***               | 0.848 (0.67-1.08) | NS                | 0.728 (0.56-0.95) | *   |
| Brazil          |                                         | 213         | 0.955 (0.70-1.31) | NS                                             | 1.445 (1.06-1.98) | *                 | 1.880 (1.41-2.51) | NS                | 1.049 (0.77-1.43) | NS                | 1.419 (0.95-2.12) | NS                | 1.742 (1.29-2.35) | ***               | 1.674 (1.26-2.23) | ***               | 2.168 (1.63-2.88) | ***               | 1.196 (0.88-1.63) | NS                |     |
| Portugal        |                                         | 237         | 0.647 (0.49-0.86) | **                                             | 1.359 (1.01-1.84) | *                 | 1.311 (1.00-1.72) | **                | 0.609 (0.46-0.80) | ***               | 1.104 (0.73-1.67) | NS                | 0.832 (0.61-1.14) | NS                | 0.736 (0.56-0.97) | *                 | 1.145 (0.86-1.53) | NS                | 0.586 (0.41-0.83) | **                |     |
| Sweden          |                                         | 312         | 0.992 (0.76-1.30) | NS                                             | 0.904 (0.68-1.21) | NS                | 1.066 (0.84-1.36) | ***               | 0.845 (0.65-1.09) | NS                | 1.823 (1.34-2.49) | ***               | 1.221 (0.95-1.58) | NS                | 2.023 (1.59-2.58) | ***               | 1.099 (0.85-1.42) | NS                | 1.019 (0.77-1.34) | NS                |     |
| Ireland         |                                         | 230         | 1.254 (0.89-1.77) | NS                                             | 0.693 (0.48-1.00) | *                 | 0.690 (0.52-0.91) | NS                | 0.671 (0.50-0.90) | **                | 0.347 (0.78-0.69) | **                | 1.382 (1.04-1.84) | *                 | 0.875 (0.67-1.15) | NS                | 1.133 (0.85-1.51) | NS                | 1.171 (0.87-1.57) | NS                |     |
| <b>Red wine</b> | <b>Age (years)<sup>€</sup></b>          | 25-29       | 8744              | 0.870 (0.78-0.97)                              | *                 | 1.368 (1.30-1.44) | ***               | 0.931 (0.88-0.99) | *                 | 0.998 (0.94-1.06) | NS                | 1.220 (1.15-1.29) | ***               | 0.969 (0.82-1.15) | NS                | 0.910 (0.85-0.98) | **                | 1.028 (0.91-1.16) | *                 | 1.012 (0.94-1.09) | NS  |
|                 |                                         | 30-34       | 4759              | 0.799 (0.70-0.92)                              | **                | 1.532 (1.43-1.64) | ***               | 0.793 (0.73-0.86) | ***               | 0.876 (0.81-0.95) | **                | 1.223 (1.14-1.31) | ***               | 1.09 (0.89-1.34)  | NS                | 0.845 (0.77-0.92) | ***               | 0.824 (0.70-0.97) | NS                | 0.970 (0.88-1.06) | NS  |
|                 | <b>Attended high school<sup>¥</sup></b> | Yes         | 29365             | 0.963 (0.69-1.35)                              | NS                | 1.196 (0.99-1.45) | NS                | 0.859 (0.70-1.05) | NS                | 0.906 (0.74-1.11) | NS                | 1.469 (1.21-1.78) | ***               | 0.809 (0.47-1.41) | NS                | 0.979 (0.78-1.23) | ***               | 0.748 (0.53-1.06) | NS                | 0.846 (0.67-1.07) | NS  |

|                            |             |       |                   |     |                   |     |                   |     |                   |     |                   |     |                   |     |                    |     |                   |     |                   |     |
|----------------------------|-------------|-------|-------------------|-----|-------------------|-----|-------------------|-----|-------------------|-----|-------------------|-----|-------------------|-----|--------------------|-----|-------------------|-----|-------------------|-----|
| <b>Country<sup>†</sup></b> | Germany     | 10294 | 0.712 (0.89-0.87) | *   | 0.702 (0.64-0.77) | *** | 0.539 (0.49-0.60) | *** | 0.526 (0.48-0.58) | *** | 0.834 (0.76-0.92) | *** | 0.329 (0.25-0.43) | *** | 0.362 (0.33-0.40)  | *** | 0.737 (0.60-0.91) | **  | 1.005 (0.90-1.12) | NS  |
|                            | Switzerland | 2230  | 0.496 (0.36-0.68) | *** | 0.887 (0.79-1.00) | *   | 0.458 (0.40-0.53) | *** | 0.514 (0.45-0.59) | *** | 2.186 (1.91-2.50) | *** | 0.369 (0.24-0.57) | *** | 0.272 (0.23-0.32)  | *** | 0.740 (0.55-1.00) | NS  | 0.697 (0.59-0.82) | *** |
|                            | Netherlands | 1715  | 0.809 (0.61-1.07) | NS  | 1.074 (0.95-1.22) | NS  | 0.907 (0.79-1.04) | NS  | 0.824 (0.72-0.94) | **  | 0.796 (0.70-0.91) | **  | 0.348 (0.22-0.54) | *** | 0.521 (0.45-0.60)  | *** | 0.965 (0.72-1.29) | NS  | 0.591 (0.50-0.70) | *** |
|                            | US          | 1698  | 1.598 (1.26-2.03) | *** | 1.282 (1.13-1.46) | *** | 1.498 (0.32-1.71) | *** | 0.967 (0.85-1.10) | NS  | 1.074 (0.94-1.23) | NS  | 0.728 (0.51-1.03) | NS  | 0.741 (0.64-0.85)  | *** | 1.605 (1.24-2.08) | *** | 1.418 (1.22-1.65) | *** |
|                            | New Zealand | 1360  | 1.753 (1.36-2.25) | *** | 0.662 (0.58-0.76) | *** | 1.042 (0.90-1.21) | NS  | 1.295 (1.13-1.49) | *** | 0.476 (0.42-0.55) | *** | 1.183 (0.86-1.64) | NS  | 1.277 (1.11-1.47)  | *** | 1.403 (1.05-1.87) | *   | 0.612 (0.51-0.74) | *** |
|                            | France      | 1478  | 2.634 (2.11-3.29) | *** | 0.652 (0.57-0.74) | *** | 0.741 (0.64-0.86) | *** | 1.022 (0.89-1.17) | NS  | 0.444 (0.39-0.51) | *** | 1.235 (0.91-1.68) | NS  | 0.959 (0.83-1.10)  | NS  | 2.953 (2.33-3.74) | *** | 0.818 (0.69-0.97) | *   |
|                            | Australia   | 1360  | 1.049 (0.79-1.39) | NS  | 1.035 (0.91-1.19) | NS  | 0.929 (0.80-1.08) | NS  | 1.012 (0.88-1.16) | NS  | 1.010 (0.88-1.16) | NS  | 0.858 (0.61-1.22) | NS  | 1.033 (0.89-1.19)  | NS  | 1.561 (1.18-2.06) | **  | 0.998 (0.84-1.18) | NS  |
|                            | Hungary     | 1055  | 2.641 (2.07-3.37) | *** | 0.339 (0.29-0.40) | *** | 1.135 (0.97-1.33) | NS  | 0.748 (0.64-0.88) | *** | 0.355 (0.31-0.41) | *** | 1.371 (0.97-1.93) | NS  | 0.748 (0.63-0.89)  | **  | 1.570 (1.16-2.12) | **  | 0.785 (0.64-0.96) | *   |
|                            | Italy       | 1268  | 4.045 (3.25-5.03) | *** | 0.613 (0.54-0.70) | *** | 0.945 (0.81-1.10) | NS  | 1.075 (0.93-1.24) | NS  | 0.514 (0.45-0.59) | *** | 1.838 (1.36-2.48) | *** | 0.628 (0.53-0.74)  | *** | 1.542 (1.16-2.06) | **  | 0.740 (0.61-0.90) | **  |
|                            | Spain       | 692   | 2.951 (2.26-3.86) | *** | 0.582 (0.49-0.69) | *** | 0.743 (0.61-0.90) | **  | 1.277 (1.07-1.52) | **  | 0.572 (0.48-0.68) | *** | 0.941 (0.60-1.48) | NS  | 0.372 (0.29-0.47)  | *** | 1.645 (1.17-2.32) | **  | 0.667 (0.52-0.85) | **  |
|                            | Colombia    | 372   | 2.062 (1.43-2.97) | *** | 1.114 (0.89-1.39) | NS  | 1.101 (0.87-1.40) | NS  | 0.688 (0.54-0.88) | **  | 0.732 (0.89-0.92) | **  | 0.263 (0.10-0.72) | **  | 0.454 (0.34-0.61)  | *** | 1.671 (1.09-2.56) | *   | 0.824 (0.61-1.11) | NS  |
|                            | Austria     | 880   | 0.796 (0.55-1.15) | NS  | 0.793 (0.68-0.93) | **  | 0.623 (0.52-0.75) | *** | 0.685 (0.58-0.81) | *** | 0.597 (0.51-0.70) | *** | 0.380 (0.21-0.69) | **  | 0.287 (0.23-0.36)  | *** | 0.612 (0.39-0.94) | *   | 0.819 (0.66-1.01) | NS  |
|                            | Norway      | 782   | 3.063 (2.37-3.95) | *** | 1.823 (0.53-2.17) | *** | 1.433 (1.21-1.70) | *** | 1.351 (1.15-1.59) | *** | 0.952 (0.80-1.13) | NS  | 0.600 (0.37-0.98) | *   | 1.098 (0.92-1.31)  | NS  | 1.821 (1.33-2.49) | *** | 1.409 (1.16-1.71) | *** |
|                            | Canada      | 468   | 2.717 (1.99-3.71) | *** | 1.154 (0.94-1.41) | NS  | 1.641 (1.34-2.01) | *** | 1.253 (1.02-1.54) | *   | 0.674 (0.55-0.83) | *** | 0.940 (0.56-1.59) | NS  | 0.747 (0.59-0.94)  | *   | 1.999 (1.38-2.89) | *** | 1.250 (0.98-1.59) | NS  |
|                            | Mexico      | 210   | 3.000 (1.99-4.53) | *** | 1.147 (0.86-1.53) | NS  | 1.685 (1.26-2.25) | *** | 0.848 (0.62-1.15) | NS  | 0.501 (0.38-0.67) | *** | 1.289 (0.68-2.45) | NS  | 0.502 (0.35-0.72)  | *** | 1.527 (0.88-2.66) | NS  | 1.028 (0.72-1.47) | NS  |
|                            | Belgium     | 378   | 1.190 (0.77-1.83) | NS  | 1.001 (0.80-1.25) | NS  | 0.773 (0.60-0.99) | *   | 0.698 (0.55-0.89) | **  | 0.889 (0.71-1.11) | NS  | 0.694 (0.37-1.31) | NS  | 0.650 (0.50-0.84)  | **  | 1.114 (0.69-1.81) | NS  | 0.748 (0.56-1.01) | NS  |
|                            | Brazil      | 213   | 2.112 (1.33-3.36) | **  | 2.018 (1.47-2.77) | *** | 2.751 (2.07-3.66) | *** | 0.924 (0.68-1.25) | NS  | 0.773 (0.58-1.03) | NS  | 0.853 (0.39-1.86) | NS  | 0.439- (0.30-0.64) | *** | 1.372 (0.76-2.48) | NS  | 1.024 (0.72-1.47) | NS  |
|                            | Portugal    | 237   | 2.885 (1.93-4.32) | *** | 0.879 (0.67-1.15) | NS  | 0.679 (0.49-0.93) | *   | 1.095 (0.83-1.45) | NS  | 0.870 (0.66-1.15) | NS  | 1.390 (0.75-2.57) | NS  | 0.636 (0.46-0.88)  | **  | 1.864 (1.13-3.08) | *   | 0.784 (0.54-1.14) | NS  |
|                            | Sweden      | 312   | 1.785 (1.18-2.70) | **  | 1.353 (1.06-1.73) | *   | 0.950 (0.73-1.24) | NS  | 1.178 (0.92-1.51) | NS  | 1.279 (0.99-1.65) | NS  | 0.428 (0.17-1.06) | NS  | 1.396 (1.09-1.79)  | **  | 1.548 (0.96-2.50) | NS  | 1.314 (0.98-1.77) | NS  |
|                            | Ireland     | 230   | 1.563 (0.97-2.52) | NS  | 0.810 (0.62-1.06) | NS  | 0.818 (0.60-1.11) | NS  | 0.700 (0.52-0.95) | *   | 0.674 (0.51-0.89) | **  | 1.052 (0.56-1.99) | NS  | 0.816 (0.60-1.11)  | NS  | 1.299 (0.75-2.26) | NS  | 0.891 (0.63-1.26) | NS  |

|                                         |             |                   |                   |                   |                   |                   |                   |                   |                   |                   |                   |                   |                   |                   |                   |                   |                   |                   |                   |     |
|-----------------------------------------|-------------|-------------------|-------------------|-------------------|-------------------|-------------------|-------------------|-------------------|-------------------|-------------------|-------------------|-------------------|-------------------|-------------------|-------------------|-------------------|-------------------|-------------------|-------------------|-----|
| <b>White wine</b>                       |             |                   |                   |                   |                   |                   |                   |                   |                   |                   |                   |                   |                   |                   |                   |                   |                   |                   |                   |     |
| <b>Age (years)<sup>€</sup></b>          | 25-29       | 8744              | 0.944 (0.88-1.02) | NS                | 0.891 (0.84-0.95) | ***               | 0.898 (0.85-0.95) | ***               | 0.967 (0.91-1.03) | NS                | 0.748 (0.70-0.80) | ***               | 1.263 (1.07-1.49) | **                | 0.970 (0.90-1.05) | NS                | 1.132 (1.02-1.26) | *                 | 0.791 (0.72-0.87) | *** |
|                                         | 30-34       | 4759              | 0.918 (0.93-1.01) | NS                | 0.751 (0.69-0.82) | ***               | 0.833 (0.77-0.90) | ***               | 0.842 (0.78-0.91) | ***               | 0.652 (0.60-0.72) | ***               | 1.550 (1.28-1.87) | ***               | 0.859 (0.78-0.95) | **                | 1.128 (0.99-1.29) | NS                | 0.710 (0.63-0.80) | *** |
| <b>Attended high school<sup>†</sup></b> | Yes         | 29365             | 0.946 (0.73-1.22) | NS                | 0.925 (0.75-1.15) | NS                | 0.932 (0.77-1.14) | NS                | 0.865 (0.71-1.06) | NS                | 0.925 (0.74-1.16) | NS                | 0.764 (0.46-1.27) | NS                | 0.917 (0.72-1.17) | NS                | 0.765 (0.56-1.05) | NS                | 0.765 (0.58-1.01) | NS  |
|                                         |             |                   | 1.156 (1.02-1.32) | *                 | 0.942 (0.86-1.03) | NS                | 0.948 (0.86-1.05) | NS                | 0.628 (0.57-0.69) | ***               | 0.711 (0.64-0.79) | ***               | 0.320 (0.24-0.42) | ***               | 0.219 (0.19-0.25) | ***               | 0.671 (0.55-0.82) | ***               | 0.656 (0.58-0.75) | *** |
| <b>Country<sup>†</sup></b>              | Germany     | 10294             | 1.780 (1.52-2.09) | ***               | 0.487 (0.43-0.56) | ***               | 0.749 (0.65-0.87) | ***               | 0.601 (0.53-0.69) | ***               | 0.700 (0.60-0.82) | ***               | 2.883 (2.23-3.74) | ***               | 0.391 (0.33-0.46) | ***               | 2.716 (2.20-3.36) | ***               | 0.400 (0.32-0.50) | *** |
|                                         | Netherlands | 1715              | 1.047 (0.88-1.25) | NS                | 1.452 (1.28-1.65) | ***               | 1.420 (1.24-1.63) | ***               | 0.953 (0.84-1.09) | NS                | 1.093 (0.94-1.27) | NS                | 0.538 (0.36-0.80) | **                | 0.695 (0.60-0.81) | ***               | 1.111 (0.86-1.44) | NS                | 0.662 (0.55-0.80) | *** |
|                                         | US          | 1698              | 0.893 (0.74-1.08) | NS                | 1.813 (1.60-2.06) | ***               | 1.264 (1.10-1.46) | **                | 0.793 (0.69-0.91) | **                | 1.734 (1.51-1.20) | ***               | 0.448 (0.29-0.69) | ***               | 0.585 (0.50-0.68) | ***               | 1.231 (0.96-1.59) | NS                | 1.099 (0.92-1.31) | NS  |
|                                         | New Zealand | 1360              | 1.753 (0.47-2.09) | ***               | 1.078 (0.94-1.24) | NS                | 1.148 (0.98-1.34) | NS                | 1.376 (1.20-1.58) | ***               | 0.899 (0.76-1.07) | NS                | 1.323 (0.96-1.83) | NS                | 1.130 (0.97-1.31) | NS                | 1.765 (1.38-2.26) | ***               | 0.768 (0.62-0.95) | *   |
|                                         | France      | 1478              | 1.427 (1.19-1.71) | ***               | 0.984 (0.86-1.13) | NS                | 0.889 (0.76-1.04) | NS                | 0.793 (0.69-0.91) | **                | 1.260 (1.08-1.47) | **                | 1.184 (0.86-1.64) | NS                | 1.159 (1.00-1.34) | *                 | 2.811 (2.25-3.51) | ***               | 0.762 (0.62-0.93) | **  |
| Australia                               | 1360        | 1.326 (1.10-1.56) | **                | 1.080 (0.94-1.24) | NS                | 0.877 (0.75-1.00) | NS                | 1.015 (0.88-1.14) | NS                | 0.982 (0.83-1.13) | NS                | 1.136 (0.82-1.44) | NS                | 1.170 (1.01-1.34) | *                 | 1.534 (1.19-2.00) | **                | 0.850 (0.70-1.00) | NS                |     |

|  |          |      |                       |  |                       |  |                       |  |                       |  |                       |  |                      |  |                       |  |                       |  |                       |
|--|----------|------|-----------------------|--|-----------------------|--|-----------------------|--|-----------------------|--|-----------------------|--|----------------------|--|-----------------------|--|-----------------------|--|-----------------------|
|  |          |      | 1.60)                 |  | 1.24)                 |  | 1.03)                 |  | 1.17)                 |  | 1.16)                 |  | 1.58)                |  | 1.36)                 |  | 1.98)                 |  | 1.04)                 |
|  | Hungary  | 1055 | 1.812 (1.49-2.20) *** |  | 0.850 (0.73-1.00) *   |  | 1.297 (1.10-1.53) **  |  | 0.824 (0.70-0.97) *   |  | 1.016 (0.85-1.22) NS  |  | 0.996 (0.67-1.58) NS |  | 0.428 (0.35-0.53) *** |  | 1.118 (0.82-1.52) NS  |  | 0.883 (0.70-1.11) NS  |
|  | Italy    | 1268 | 1.292 (1.06-1.57) *   |  | 0.758 (0.65-0.88) *** |  | 0.963 (0.82-1.14) NS  |  | 0.825 (0.71-0.96) *   |  | 0.709 (0.59-0.85) *** |  | 0.841 (0.57-1.25) NS |  | 0.385 (0.32-0.47) *** |  | 1.075 (0.80-1.44) NS  |  | 0.489 (0.38-0.63) *** |
|  | Spain    | 692  | 1.048 (0.81-1.35) NS  |  | 0.779 (0.65-0.94) **  |  | 0.902 (0.73-1.11) NS  |  | 0.887 (0.74-1.07) NS  |  | 1.092 (0.89-1.34) NS  |  | 0.614 (0.35-1.07) NS |  | 0.284 (0.21-0.38) *** |  | 0.976 (0.67-1.42) NS  |  | 0.516 (0.38-0.71) *** |
|  | Colombia | 372  | 0.364 (0.22-0.59) *** |  | 1.045 (0.83-1.32) NS  |  | 0.751 (0.57-1.00) *   |  | 0.430 (0.33-0.57) *** |  | 1.350 (1.05-1.74) *   |  | 0.069 (0.01-0.50) ** |  | 0.229 (0.15-0.34) *** |  | 0.912(0.56-1.49) NS   |  | 0.573 (0.39-0.85) **  |
|  | Austria  | 880  | 2.643 (2.18-3.20) *** |  | 0.812 (0.69-0.96) *   |  | 1.152 (0.96-1.38) NS  |  | 0.971 (0.82-1.15) NS  |  | 0.430 (0.34-0.55) *** |  | 0.563 (0.33-0.96) *  |  | 0.254 (0.20-0.33) *** |  | 1.423 (1.05-1.93) *   |  | 0.616 (0.47-0.80) *** |
|  | Norway   | 782  | 2.803 (2.31-3.41) *** |  | 0.820 (0.69-0.98) *   |  | 1.548 (1.29-1.85) *** |  | 1.061 (0.90-1.26) NS  |  | 0.523 (0.41-0.67) *** |  | 0.666 (0.41-1.09) NS |  | 0.680 (0.56-0.83) *** |  | 2.303 (1.75-3.03) *** |  | 0.626 (0.48-0.82) **  |
|  | Canada   | 468  | 1.697 (1.31-2.20) *** |  | 1.550 (1.27-1.90) *** |  | 1.321 (1.06-1.65) *   |  | 1.075 (0.87-1.33) NS  |  | 1.069 (0.84-1.36) NS  |  | 0.714 (0.39-1.31) NS |  | 0.569 (0.44-0.74) *** |  | 1.660 (1.16-2.38) **  |  | 1.140 (0.87-1.50) NS  |
|  | Mexico   | 210  | 0.681 (0.42-1.11) NS  |  | 1.123 (0.83-1.51) NS  |  | 0.605 (0.41-0.89) *   |  | 0.491 (0.35-0.70) **  |  | 1.058 (0.75-1.50) NS  |  | 0.233 (0.56-0.95) *  |  | 0.234 (0.14-0.39) *** |  | 0.640 (0.31-1.33) NS  |  | 0.422 (0.24-0.74) **  |
|  | Belgium  | 378  | 0.899 (0.64-1.26) NS  |  | 1.206 (0.96-1.51) NS  |  | 1.012 (0.78-1.31) NS  |  | 0.664 (0.52-0.85) **  |  | 1.001 (0.77-1.31) NS  |  | 1.177 (0.69-2.00) NS |  | 0.688 (0.53-0.90) **  |  | 0.823 (0.50-1.36) NS  |  | 0.828 (0.59-1.16) NS  |
|  | Brazil   | 213  | 0.519 (0.30-0.89) *   |  | 1.978 (1.49-2.63) *** |  | 1.626 (1.20-2.21) **  |  | 0.632 (0.46-0.88) **  |  | 1.416 (1.03-1.95) *   |  | 0.501 (0.18-1.38) NS |  | 0.354 (0.23-0.55) *** |  | 0.579 (0.27-1.25) NS  |  | 0.558 (0.34-0.92) *   |
|  | Portugal | 237  | 1.103 (0.75-0.63) NS  |  | 0.873 (0.65-1.17) NS  |  | 0.902 (0.65-1.25) NS  |  | 0.782 (0.58-1.05) NS  |  | 0.899 (0.64-1.26) NS  |  | 1.098 (0.55-2.12) NS |  | 0.587 (0.41-0.84) **  |  | 1.436 (0.86-2.39) NS  |  | 0.633 (0.40-1.00) NS  |
|  | Sweden   | 312  | 1.525 (1.10-2.11) NS  |  | 1.082 (0.84-1.39) NS  |  | 1.305 (0.99-1.72) NS  |  | 1.068 (0.83-1.38) NS  |  | 0.897 (0.66-1.22) NS  |  | 0.457 (0.18-1.13) NS |  | 0.977 (0.74-1.29) NS  |  | 1.369 (0.86-2.18) NS  |  | 1.187 (0.83-1.70) NS  |
|  | Ireland  | 230  | 1.552 (1.09-2.21) NS  |  | 0.981 (0.73-1.31) NS  |  | 0.955 (0.69-1.32) NS  |  | 0.807 (0.60-1.09) NS  |  | 0.638 (0.43-0.94) *   |  | 1.341 (0.74-2.44) NS |  | 0.601 (0.43-0.85) **  |  | 1.138 (0.67-1.95) NS  |  | 0.895 (0.60-1.33) NS  |

**Beer**

|  |                                         |             |       |                       |                       |                       |                       |                       |                       |                       |                       |                       |
|--|-----------------------------------------|-------------|-------|-----------------------|-----------------------|-----------------------|-----------------------|-----------------------|-----------------------|-----------------------|-----------------------|-----------------------|
|  | <b>Age (years)<sup>ε</sup></b>          | 25-29       | 8744  | 0.890 (0.84-0.95) *** | 0.833 (0.79-0.88) *** | 0.877 (0.82-0.94) *** | 0.838 (0.79-0.89) *** | 0.961 (0.91-1.02) NS  | 0.890 (0.80-0.99) **  | 1.037 (0.97-1.11) NS  | 0.927 (0.85-1.02) NS  | 0.987 (0.90-1.08) NS  |
|  |                                         | 30-34       | 4759  | 0.772 (0.71-0.84) *** | 0.735 (0.69-0.79) *** | 0.761 (0.70-0.83) *** | 0.669 (0.62-0.72) *** | 0.865 (0.81-0.93) *** | 0.888 (0.77-1.02) NS  | 0.885 (0.81-0.97) **  | 0.814 (0.72-0.92) **  | 0.906 (0.81-1.02) NS  |
|  | <b>Attended high school<sup>ξ</sup></b> | Yes         | 29365 | 1.001 (0.82-1.23) NS  | 1.153 (0.95-1.40) NS  | 1.036 (0.82-1.30) NS  | 0.889 (0.74-1.08) NS  | 0.782 (0.65-0.95) *   | 0.936 (0.68-1.30) NS  | 0.901 (0.72-1.13) NS  | 1.107 (0.83-1.48) NS  | 0.902 (0.68-1.19) NS  |
|  | <b>Country<sup>†</sup></b>              | Germany     | 10294 | 1.233 (1.11-1.38) *** | 1.092 (1.00-1.19) NS  | 1.959 (1.73-2.22) *** | 0.829 (0.76-0.91) *** | 0.797 (0.73-0.87) *** | 0.553 (0.48-0.64) *** | 0.458 (0.41-0.51) *** | 0.797 (0.68-0.93) **  | 1.297 (1.12-1.50) **  |
|  |                                         | Switzerland | 2230  | 1.951 (1.70-2.24) *** | 0.940 (0.94-1.06) NS  | 2.043 (1.75-2.39) *** | 0.820 (0.73-0.92) **  | 0.281 (0.25-0.32) *** | 0.521 (0.42-0.65) *** | 0.379 (0.32-0.45) *** | 0.883 (0.71-1.09) NS  | 0.825 (0.66-1.02) NS  |
|  |                                         | Netherlands | 1715  | 2.619 (2.28-3.01) *** | 0.733 (0.65-0.83) *** | 2.466 (2.11-2.89) *** | 1.336 (1.18-1.51) *** | 0.529 (0.47-0.60) *** | 0.938 (0.77-1.15) NS  | 1.035 (0.90-1.19) NS  | 1.230 (1.01-1.50) *   | 1.231 (1.01-1.51) *   |
|  |                                         | US          | 1698  | 1.564 (1.35-1.81) *** | 1.596 (1.41-1.81) *** | 1.496 (1.26-1.78) *** | 1.076 (0.95-1.22) NS  | 0.956 (0.84-1.08) NS  | 0.991 (0.81-1.21) NS  | 1.252 (1.09-1.44) **  | 1.619 (1.34-1.97) *** | 1.551 (1.28-1.89) *** |
|  |                                         | New Zealand | 1360  | 1.055 (0.89-1.25) NS  | 1.626 (1.42-1.86) *** | 1.292 (1.07-1.56) **  | 1.187 (1.04-1.36) *   | 1.166 (1.02-1.33) *   | 0.574 (0.45-0.74) *** | 0.973 (0.83-1.14) NS  | 1.289 (1.04-1.61) *   | 0.718 (0.56-0.93) *   |
|  |                                         | France      | 1478  | 2.220 (1.92-2.57) *** | 1.674 (1.47-1.91) *** | 1.265 (1.06-1.52) *   | 0.806 (0.71-0.92) **  | 0.427 (0.37-0.49) *** | 0.328 (0.25-0.44) *** | 0.649 (0.55-0.77) *** | 2.392 (1.99-2.88) *** | 1.021 (0.82-1.27) NS  |
|  |                                         | Australia   | 1360  | 1.374 (1.17-1.61) *** | 1.807 (1.58-2.07) *** | 1.119 (0.92-1.36) NS  | 1.365 (1.19-1.56) *** | 0.928 (0.81-1.06) NS  | 0.675 (0.53-0.86) **  | 1.054 (0.90-1.23) NS  | 1.148 (0.92-1.43) NS  | 1.037 (0.83-1.30) NS  |
|  |                                         | Hungary     | 1055  | 1.648 (1.39-1.95) *** | 0.813 (0.70-0.94) **  | 1.631 (1.34-1.98) *** | 0.626 (0.54-0.73) *** | 0.858 (0.74-0.99) *   | 0.373 (0.27-0.51) *** | 0.546 (0.45-0.67) *** | 0.760 (0.58-1.00) NS  | 1.197 (0.94-1.52) NS  |
|  |                                         | Italy       | 1268  | 1.389 (1.18-1.64) *** | 0.914 (0.80-1.05) NS  | 1.171 (0.96-1.43) NS  | 0.622 (0.54-0.72) *** | 0.372 (0.32-0.43) *** | 0.508 (0.39-0.67) *** | 0.239 (0.19-0.30) *** | 0.521 (0.39-0.70) *** | 0.485 (0.36-0.66) *** |
|  |                                         | Spain       | 692   | 1.756 (1.45-2.13) *** | 1.246 (1.05-1.48) *   | 1.569 (1.25-1.97) *** | 1.064 (0.90-1.26) NS  | 0.800 (0.67-0.95) *   | 0.517 (0.37-0.73) *** | 0.349 (0.27-0.46) *** | 1.292 (0.98-1.70) NS  | 1.382 (1.06-1.81) *   |
|  |                                         | Colombia    | 372   | 2.287 (1.81-2.90) *** | 1.515 (1.21-1.89) *** | 1.949 (1.49-2.56) *** | 0.838 (0.67-1.05) NS  | 0.557 (0.44-0.70) *** | 0.322 (0.19-0.55) *** | 0.557 (0.41-0.76) *** | 1.685 (1.22-2.32) **  | 1.274 (0.90-1.81) NS  |
|  |                                         | Austria     | 880   | 0.979 (0.80-1.20) NS  | 1.241 (1.06-1.45) **  | 1.692 (1.38-2.08) *** | 0.798 (0.68-0.93) **  | 1.331 (1.14-1.55) *** | 0.360 (0.25-0.52) *** | 0.475 (0.38-0.59) *** | 0.643 (0.47-0.88) **  | 1.368 (1.06-1.76) *   |
|  |                                         | Norway      | 782   | 2.408 (2.02-2.87) *** | 1.875 (1.59-2.22) *** | 2.129 (1.74-2.60) *** | 1.471 (0.25-1.73) *** | 0.962 (0.82-1.13) NS  | 0.442 (0.32-0.62) *** | 0.712 (0.58-0.87) **  | 2.245 (1.79-2.81) *** | 1.825 (1.44-2.31) *** |



|          |     |                       |                       |                       |                      |                       |                       |                       |                       |                       |
|----------|-----|-----------------------|-----------------------|-----------------------|----------------------|-----------------------|-----------------------|-----------------------|-----------------------|-----------------------|
| Canada   | 468 | 1.825 (1.46-2.28) *** | 1.476 (1.21-1.81) *** | 1.644 (1.27-2.13) *** | 1.362 (1.12-1.67) ** | 1.232 (1.01-1.50) *   | 0.981 (0.71-1.36) NS  | 1.264 (1.01-1.58) *   | 1.646 (1.22-2.21) **  | 1.511 (1.11-2.05) **  |
| Mexico   | 210 | 2.337 (1.73-3.16) *** | 1.518 (1.34-2.03) **  | 1.499 (1.03-2.17) *   | 1.408 (1.06-1.88) *  | 0.764 (0.57-1.02) NS  | 0.912 (0.58-1.45) NS  | 0.794 (0.56-1.13) NS  | 2.355 (1.63-3.42) *** | 1.571 (1.04-2.38) *   |
| Belgium  | 378 | 1.964 (1.55-2.49) *** | 1.059 (0.85-1.32) NS  | 2.297 (1.77-2.98) *** | 0.963 (0.77-1.20) NS | 0.513 (0.41-0.65) *** | 0.733 (0.50-1.07) NS  | 1.488 (1.17-1.89) **  | 1.053 (0.73-1.52) NS  | 1.501 (1.09-2.08) *   |
| Brazil   | 213 | 2.153 (1.58-2.93) *** | 1.653 (1.24-2.20) **  | 2.623 (1.89-3.65) *** | 1.275 (0.96-1.70) NS | 1.040 (0.79-1.38) NS  | 0.992 (0.62-1.58) NS  | 0.960 (0.69-1.34) NS  | 2.089 (1.42-3.08) *** | 2.294 (1.57-3.35) *** |
| Portugal | 237 | 2.359 (1.77-3.15) *** | 0.766 (0.58-1.01) NS  | 1.467 (1.02-2.11) *   | 0.821 (0.62-1.08) NS | 0.311 (0.23-0.43) *** | 0.391 (0.20-0.75) **  | 0.479 (0.32-0.71) *** | 1.573 (1.05-2.36) *   | 0.832 (0.50-1.39) NS  |
| Sweden   | 312 | 2.462 (1.91-3.17) *** | 1.796 (1.41-2.30) *** | 2.027 (1.52-2.70) *** | 1.471 (1.16-1.87) ** | 1.093 (0.86-1.39) NS  | 0.386 (0.23-0.66) *** | 0.675 (0.49-0.93) *   | 2.556 (1.87-3.49) *** | 1.841 (1.31-2.58) *** |
| Ireland  | 230 | 1.100 (0.79-1.53) NS  | 1.239 (0.94-1.63) NS  | 1.179 (0.81-1.71) NS  | 1.108 (0.84-1.46) NS | 1.046 (0.80-1.37) NS  | 0.542 (0.33-0.90) *   | 0.853 (0.61-1.19) NS  | 0.821 (0.50-1.34) NS  | 1.031 (0.66-1.61) NS  |

AOR, adjusted odds ratio; CI, confidence interval; NS, not significant.

\*p<0.05, \*\*p<0.01, \*\*\*p<0.001.

<sup>¶</sup>Country variable was included in the logistic regression model for Table 4 and has been included in separate supplementary table due to space restrictions.

<sup>€</sup>Reference category 18-24 years

<sup>¥</sup>Reference category not attended high school

<sup>†</sup>Reference category United Kingdom

**Supplementary Table E: Logistic regression model<sup>¶</sup> for age, educational attainment and country of residence and relationships with emotions associated with drinking any type of alcohol<sup>€</sup> in different settings<sup>†</sup>**

**a: Positive emotions**

|                             |                             | Mostly drank a drink which made you feel energised |                    |             |                   | Mostly drank mostly a drink which made you feel relaxed |                   |             |                   | Mostly drank a drink which made you feel sexy |                   |             |                   | Mostly drank a drink which made you feel confident |                   |             |                   |     |
|-----------------------------|-----------------------------|----------------------------------------------------|--------------------|-------------|-------------------|---------------------------------------------------------|-------------------|-------------|-------------------|-----------------------------------------------|-------------------|-------------|-------------------|----------------------------------------------------|-------------------|-------------|-------------------|-----|
|                             |                             | At home                                            |                    | When out    |                   | At home                                                 |                   | When out    |                   | At home                                       |                   | When out    |                   | At home                                            |                   | When out    |                   |     |
| n                           |                             | AOR (95%CI)                                        | p                  | AOR (95%CI) | p                 | AOR (95%CI)                                             | p                 | AOR (95%CI) | p                 | AOR (95%CI)                                   | p                 | AOR (95%CI) | p                 | AOR (95%CI)                                        | p                 | AOR (95%CI) | p                 |     |
| <b>Age (years)</b>          | 18-24 <sup>‡</sup>          | 16333                                              |                    |             |                   |                                                         |                   |             |                   |                                               |                   |             |                   |                                                    |                   |             |                   |     |
|                             | 25-29                       | 8744                                               | 0.825 (0.78-0.88)  | ***         | 0.704 (0.67-0.74) | ***                                                     | 0.966 (0.91-1.02) | NS          | 1.087 (1.02-1.15) | **                                            | 0.859 (0.81-0.91) | ***         | 0.759 (0.72-0.80) | ***                                                | 0.832 (0.79-0.88) | ***         | 0.756 (0.72-0.80) | *** |
|                             | 30-34                       | 4759                                               | 0.817 (0.76-0.88)  | ***         | 0.563 (0.52-0.60) | ***                                                     | 0.956 (0.89-1.02) | NS          | 1.097 (1.03-1.17) | **                                            | 0.775 (0.72-0.84) | ***         | 0.618 (0.57-0.67) | ***                                                | 0.680 (0.64-0.73) | ***         | 0.555 (0.52-0.59) | *** |
|                             | No <sup>‡</sup>             | 471                                                |                    |             |                   |                                                         |                   |             |                   |                                               |                   |             |                   |                                                    |                   |             |                   |     |
| <b>Attended high school</b> | Yes                         | 29365                                              | 0.826 (0.68-1.00)  | NS          | 0.818 (0.68-0.99) | *                                                       | 1.214 (1.00-1.47) | *           | 1.176 (0.97-1.42) | NS                                            | 0.818 (0.67-1.00) | *           | 0.918 (0.76-1.11) | NS                                                 | 0.864 (0.71-1.05) | NS          | 0.782 (0.64-0.96) | *   |
| <b>Country</b>              | United Kingdom <sup>‡</sup> | 2604                                               |                    |             |                   |                                                         |                   |             |                   |                                               |                   |             |                   |                                                    |                   |             |                   |     |
|                             | Germany                     | 10294                                              | 1.091 (1.03-1.15)  | **          | 0.467 (0.43-0.51) | ***                                                     | 0.962 (0.88-1.05) | NS          | 1.338 (1.27-1.41) | ***                                           | 0.952 (0.87-1.05) | NS          | 0.888 (0.81-0.97) | *                                                  | 0.650 (0.59-0.71) | ***         | 0.526 (0.48-0.58) | *** |
|                             | Switzerland                 | 2230                                               | 1.087 (0.95-1.24)  | NS          | 0.787 (0.70-0.89) | ***                                                     | 0.821 (0.73-0.92) | **          | 1.130 (1.01-1.27) | *                                             | 0.819 (0.72-0.93) | **          | 1.025 (0.91-1.16) | NS                                                 | 0.570 (0.51-0.64) | ***         | 0.615 (0.54-0.70) | *** |
|                             | Netherlands                 | 1715                                               | 1.312 (1.15-1.50)  | ***         | 0.595 (0.53-0.68) | ***                                                     | 0.834 (0.73-0.95) | **          | 1.362 (1.20-1.54) | ***                                           | 1.458 (0.28-1.66) | ***         | 0.855 (0.75-0.97) | *                                                  | 0.925 (0.82-1.05) | NS          | 0.658 (0.58-0.75) | *** |
|                             | US                          | 1698                                               | 1.553 (1.36-1.78)  | ***         | 0.991 (0.87-1.13) | NS                                                      | 1.328 (1.16-1.52) | ***         | 1.707 (1.51-1.93) | ***                                           | 1.343 (1.18-1.53) | ***         | 1.421 (1.25-1.61) | ***                                                | 1.111 (0.98-1.26) | NS          | 1.042 (0.91-1.20) | NS  |
|                             | New Zealand                 | 1360                                               | 1.321 (0.14-1.53)  | ***         | 0.695 (0.61-0.80) | ***                                                     | 1.180 (1.03-1.36) | *           | 2.088 (1.83-2.39) | ***                                           | 1.074 (0.93-1.24) | NS          | 1.004 (0.87-1.15) | NS                                                 | 1.371 (1.20-1.57) | ***         | 1.008 (0.87-1.17) | NS  |
|                             | France                      | 1478                                               | 1.560 (0.136-1.80) | NS          | 1.040 (0.91-1.19) | NS                                                      | 1.077 (0.94-1.23) | NS          | 1.892 (1.66-2.15) | ***                                           | 0.798 (0.69-0.92) | **          | 0.944 (0.83-1.08) | NS                                                 | 0.743 (0.65-0.85) | ***         | 0.631 (0.55-0.72) | *** |
|                             | Australia                   | 1360                                               | 1.106 (0.95-1.29)  | ***         | 0.628 (0.55-0.72) | ***                                                     | 1.486 (1.28-1.72) | ***         | 2.388 (2.09-2.73) | ***                                           | 0.850 (0.73-0.98) | *           | 0.787 (0.68-0.91) | **                                                 | 1.113 (0.97-1.27) | NS          | 0.934 (0.81-1.08) | NS  |
|                             | Hungary                     | 1055                                               | 1.447 (1.23-1.70)  | NS          | 0.637 (0.55-0.74) | ***                                                     | 0.521 (0.45-0.60) | ***         | 1.019 (0.88-1.18) | NS                                            | 1.058 (0.90-1.24) | NS          | 0.822 (0.70-0.96) | *                                                  | 0.646 (0.56-0.75) | ***         | 0.469 (0.40-0.55) | *** |
|                             | Italy                       | 1268                                               | 1.159 (0.99-1.35)  | ***         | 0.696 (0.61-0.80) | ***                                                     | 0.677 (0.59-0.78) | ***         | 1.148 (1.00-1.32) | *                                             | 0.813 (0.70-0.95) | **          | 0.823 (0.71-0.95) | **                                                 | 0.607 (0.53-0.70) | ***         | 0.420 (0.37-0.49) | *** |
|                             | Spain                       | 692                                                | 1.437 (1.19-1.73)  | ***         | 1.038 (0.87-1.23) | NS                                                      | 0.736 (0.62-0.87) | ***         | 0.969 (0.81-1.15) | NS                                            | 0.802 (0.66-0.97) | *           | 0.961 (0.80-1.15) | NS                                                 | 0.896 (0.76-1.06) | ***         | 0.873 (0.73-1.05) | NS  |
|                             | Colombia                    | 372                                                | 2.063 (1.64-2.59)  | NS          | 1.547 (1.23-1.95) | ***                                                     | 0.913 (0.73-1.15) | NS          | 1.079 (0.86-1.35) | NS                                            | 1.338 (1.06-1.68) | *           | 1.641 (1.31-2.05) | ***                                                | 0.800 (0.64-1.00) | *           | 0.934 (0.74-1.19) | NS  |
|                             | Austria                     | 880                                                | 0.966 (0.81-1.16)  | ***         | 0.377 (0.32-0.45) | ***                                                     | 1.083 (0.92-1.28) | NS          | 1.813 (1.55-2.12) | ***                                           | 0.957 (0.81-1.13) | NS          | 0.791 (0.67-0.93) | **                                                 | 0.701 (0.60-0.82) | ***         | 0.463 (0.39-0.54) | *** |
|                             | Norway                      | 782                                                | 1.849 (1.56-2.19)  | ***         | 0.640 (0.54-0.76) | ***                                                     | 1.427 (1.19-1.71) | ***         | 2.578 (2.19-3.04) | ***                                           | 1.211 (1.02-1.44) | *           | 0.758 (0.64-0.90) | **                                                 | 1.221 (1.03-1.44) | *           | 0.763 (0.64-0.91) | **  |
|                             | Canada                      | 468                                                | 1.509 (1.22-1.87)  | ***         | 0.950 (0.78-1.16) | NS                                                      | 1.337 (1.08-1.66) | **          | 1.689 (1.39-2.06) | ***                                           | 1.414 (1.15-1.74) | **          | 0.972 (0.79-1.20) | NS                                                 | 1.334 (1.09-1.64) | **          | 0.916 (0.74-1.14) | NS  |
|                             | Mexico                      | 210                                                | 2.016 (1.50-2.70)  | NS          | 0.996 (0.75-1.33) | NS                                                      | 1.064 (0.79-1.44) | NS          | 1.736 (1.31-2.30) | ***                                           | 1.130 (0.84-1.53) | NS          | 1.149 (0.86-1.54) | NS                                                 | 1.098 (0.82-1.47) | NS          | 1.001 (0.73-1.37) | NS  |
|                             | Belgium                     | 378                                                | 1.021 (0.80-1.31)  | ***         | 0.588 (0.47-0.73) | ***                                                     | 1.198 (0.95-1.52) | NS          | 1.741 (1.40-2.16) | ***                                           | 1.196 (0.95-1.50) | NS          | 0.924 (0.74-1.16) | NS                                                 | 0.655 (0.53-0.82) | ***         | 0.540 (0.43-0.68) | *** |
|                             | Brazil                      | 213                                                | 1.734 (1.29-2.34)  | *           | 0.719 (0.54-0.96) | *                                                       | 1.407 (1.03-1.93) | *           | 2.034 (1.53-2.70) | ***                                           | 1.725 (1.29-2.30) | ***         | 1.187 (0.89-1.59) | NS                                                 | 0.980 (0.74-1.30) | NS          | 0.797 (0.59-1.07) | NS  |
|                             | Portugal                    | 237                                                | 1.430 (1.07-1.92)  | ***         | 0.711 (0.54-0.93) | *                                                       | 0.836 (0.64-1.10) | NS          | 1.241 (0.95-1.63) | NS                                            | 0.802 (0.59-1.09) | NS          | 0.819 (0.61-1.09) | NS                                                 | 0.662 (0.51-0.87) | **          | 0.508 (0.39-0.67) | *** |
|                             | Sweden                      | 312                                                | 1.788 (1.39-2.30)  | NS          | 0.638 (0.50-0.81) | ***                                                     | 1.275 (0.99-1.65) | NS          | 1.323 (1.01-1.74) | ***                                           | 1.010 (0.78-1.31) | NS          | 0.755 (0.58-0.98) | *                                                  | 1.259 (0.99-1.61) | NS          | 0.690 (0.54-0.89) | **  |
|                             | Ireland                     | 230                                                | 0.965 (0.75-1.07)  | NS          | 0.543 (0.41-0.72) | ***                                                     | 0.894 (0.67-1.18) | NS          | 1.332 (1.22-1.46) | *                                             | 0.879 (0.65-1.18) | NS          | 0.690 (0.52-0.93) | *                                                  | 0.959 (0.73-1.26) | NS          | 0.650 (0.49-0.87) | **  |

AOR, adjusted odds ratio; CI, confidence interval; NS, not significant.

\*p<0.05, \*\*p<0.01, \*\*\*p<0.001.

<sup>¶</sup>Country variable was included in the logistic regression model for Table 5 and has been included in separate supplementary table due to space restrictions.

<sup>€</sup>Emotions from drinking respondents reported regardless of the type of alcohol they associate it with. Includes emotions associated with spirits, white wine, red wine and beer.

<sup>†</sup>Respondents reported which drink type they mostly drank when at home and when out.

<sup>‡</sup>Reference category

**b: Negative emotions**

|                             |       | Mostly drank a drink which makes you feel tired |     |                   |     | Mostly drank a drink which makes you feel aggressive |     |                   |     | Mostly drank a drink which makes you feel ill |     |                   |     | Mostly drank a drink which makes you feel tearful |     |                   |     |
|-----------------------------|-------|-------------------------------------------------|-----|-------------------|-----|------------------------------------------------------|-----|-------------------|-----|-----------------------------------------------|-----|-------------------|-----|---------------------------------------------------|-----|-------------------|-----|
|                             |       | When at home                                    |     | When out          |     | When at home                                         |     | When out          |     | When at home                                  |     | When out          |     | When at home                                      |     | When out          |     |
|                             | n     | AOR (95%CI)                                     | p   | AOR (95%CI)       | p   | AOR (95%CI)                                          | p   | AOR (95%CI)       | p   | AOR (95%CI)                                   | p   | AOR (95%CI)       | p   | AOR (95%CI)                                       | p   | AOR (95%CI)       | p   |
| <b>Age (years)</b>          |       |                                                 |     |                   |     |                                                      |     |                   |     |                                               |     |                   |     |                                                   |     |                   |     |
| 18-24 <sup>‡</sup>          | 16333 |                                                 |     |                   |     |                                                      |     |                   |     |                                               |     |                   |     |                                                   |     |                   |     |
| 25-29                       | 8744  | 0.986 (0.94-1.04)                               | NS  | 1.147 (1.08-1.22) | *** | 0.884 (0.79-0.99)                                    | *   | 0.774 (0.71-0.84) | *** | 0.995 (0.92-1.08)                             | NS  | 0.851 (0.80-0.91) | *** | 0.897 (0.83-0.97)                                 | **  | 0.893 (0.83-0.96) | **  |
| 30-34                       | 4759  | 0.863 (0.81-0.92)                               | *** | 1.115 (1.04-1.20) | *** | 0.904 (0.78-1.04)                                    | *   | 0.712 (0.64-0.79) | *** | 0.961 (0.87-1.07)                             | NS  | 0.713 (0.65-0.78) | *** | 0.806 (0.73-0.89)                                 | *** | 0.746 (0.67-0.83) | *** |
| <b>Attended high school</b> |       |                                                 |     |                   |     |                                                      |     |                   |     |                                               |     |                   |     |                                                   |     |                   |     |
| No <sup>‡</sup>             | 471   |                                                 |     |                   |     |                                                      |     |                   |     |                                               |     |                   |     |                                                   |     |                   |     |
| Yes                         | 29365 | 1.008 (0.84-1.22)                               | *   | 0.940 (0.77-1.15) | NS  | 0.799 (0.58-1.09)                                    | NS  | 0.750 (0.59-0.96) | *   | 0.762 (0.60-0.97)                             | *   | 0.717 (0.58-0.88) | *** | 0.754 (0.60-0.95)                                 | *   | 0.735 (0.58-0.93) | **  |
| <b>Country</b>              |       |                                                 |     |                   |     |                                                      |     |                   |     |                                               |     |                   |     |                                                   |     |                   |     |
| United Kingdom <sup>‡</sup> | 2604  |                                                 |     |                   |     |                                                      |     |                   |     |                                               |     |                   |     |                                                   |     |                   |     |
| Germany                     | 10294 | 0.763 (0.70-0.83)                               | *** | 1.400 (1.26-1.55) | *** | 0.447 (0.38-0.53)                                    | *** | 0.559 (0.50-0.63) | *** | 0.436 (0.38-0.50)                             | *** | 0.476 (0.43-0.53) | *** | 0.851 (0.49-0.56)                                 | *** | 0.685 (0.61-0.77) | *** |
| Switzerland                 | 2230  | 0.797 (0.71-0.89)                               | *** | 0.606 (0.52-0.70) | *** | 0.536 (0.42-0.68)                                    | *** | 0.641 (0.54-0.76) | *** | 0.395 (0.33-0.48)                             | *** | 0.459 (0.40-0.53) | *** | 0.636 (0.53-0.76)                                 | *** | 0.546 (0.46-0.65) | *** |
| Netherlands                 | 1715  | 0.806 (0.71-0.91)                               | **  | 1.387 (1.21-1.60) | *** | 0.636 (0.51-0.80)                                    | *** | 0.503 (0.42-0.60) | *** | 1.062 (0.91-1.25)                             | NS  | 0.830 (0.72-0.95) | **  | 0.761 (0.65-0.90)                                 | **  | 0.612 (0.52-0.72) | *** |
| US                          | 1698  | 0.889 (0.79-1.01)                               | NS  | 1.303 (1.13-1.50) | *** | 1.389 (1.15-1.68)                                    | **  | 1.657 (1.43-0.92) | *** | 1.326 (1.13-1.55)                             | *** | 1.498 (1.31-1.71) | *** | 1.307 (1.12-1.53)                                 | **  | 1.264 (1.09-1.47) | **  |
| New Zealand                 | 1360  | 0.843 (0.74-0.96)                               | *   | 1.539 (1.33-1.78) | *** | 0.746 (0.89-0.95)                                    | *   | 0.686 (0.57-0.83) | *** | 1.113 (0.94-1.32)                             | NS  | 0.834 (0.72-0.97) | *   | 0.606 (0.50-0.74)                                 | *** | 0.748 (0.62-0.90) | **  |
| France                      | 1478  | 0.494 (0.43-0.57)                               | *** | 0.938 (0.80-1.09) | NS  | 0.460 (0.35-0.60)                                    | *** | 1.003 (0.85-1.18) | NS  | 1.085 (0.92-1.28)                             | NS  | 1.282 (1.12-1.47) | *** | 0.878 (0.74-1.05)                                 | NS  | 1.016 (0.87-1.19) | NS  |
| Australia                   | 1360  | 0.969 (0.85-1.11)                               | NS  | 1.633 (1.41-1.89) | *** | 0.747 (0.59-0.95)                                    | *   | 0.645 (0.53-0.78) | *** | 1.000 (0.84-1.19)                             | NS  | 0.734 (0.63-0.86) | *** | 0.941 (0.79-1.12)                                 | NS  | 0.829 (0.70-0.99) | *   |
| Hungary                     | 1055  | 0.548 (0.47-0.64)                               | *** | 1.289 (1.11-1.53) | **  | 0.566 (0.42-0.76)                                    | *** | 0.614 (0.50-0.76) | *** | 0.684 (0.55-0.85)                             | *** | 0.639 (0.53-0.76) | *** | 0.747 (0.60-0.92)                                 | **  | 0.573 (0.46-0.71) | *** |
| Italy                       | 1268  | 0.399 (0.35-0.46)                               | *** | 0.719 (0.61-0.85) | *** | 0.552 (0.42-0.73)                                    | *** | 0.936 (0.78-1.12) | NS  | 0.422 (0.33-0.53)                             | *** | 0.583 (0.49-0.69) | *** | 0.501 (0.40-0.63)                                 | *** | 0.440 (0.35-0.55) | *** |
| Spain                       | 692   | 0.717 (0.60-0.85)                               | *** | 1.058 (0.87-1.29) | NS  | 0.706 (0.51-0.97)                                    | *   | 1.235 (1.00-1.53) | NS  | 0.393 (0.29-0.53)                             | *** | 0.715 (0.58-0.88) | **  | 0.847 (0.67-1.08)                                 | NS  | 1.024 (0.83-1.27) | NS  |
| Colombia                    | 372   | 0.526 (0.42-0.66)                               | *** | 0.814 (0.62-1.06) | NS  | 0.866 (0.60-1.26)                                    | NS  | 1.367 (1.05-1.78) | *   | 0.824 (0.61-1.12)                             | NS  | 1.067 (0.84-1.36) | NS  | 0.885 (0.65-1.20)                                 | NS  | 1.599 (1.24-2.06) | *** |
| Austria                     | 880   | 0.842 (0.72-0.98)                               | *   | 1.892 (1.60-2.23) | *** | 0.282 (0.18-0.43)                                    | *** | 0.327 (0.25-0.44) | *** | 0.380 (0.29-0.53)                             | *** | 0.307 (0.24-0.39) | *** | 0.848 (0.68-1.06)                                 | NS  | 0.571 (0.45-0.72) | *** |
| Norway                      | 782   | 0.852 (0.73-1.00)                               | NS  | 2.103 (1.77-2.50) | *** | 0.475 (0.34-0.67)                                    | *** | 0.352 (0.27-0.47) | *** | 0.831 (0.67-1.04)                             | NS  | 0.556 (0.45-0.68) | *** | 1.117 (0.91-1.38)                                 | NS  | 0.868 (0.70-1.07) | NS  |
| Canada                      | 468   | 1.038 (0.85-1.26)                               | NS  | 1.833 (1.48-2.27) | *** | 1.232 (0.90-1.69)                                    | NS  | 1.145 (0.89-1.47) | NS  | 1.199 (0.93-1.54)                             | NS  | 1.132 (0.91-1.41) | NS  | 1.230 (0.96-1.58)                                 | NS  | 1.090 (0.85-1.39) | NS  |
| Mexico                      | 210   | 0.648 (0.46-0.87)                               | **  | 1.103 (0.80-1.53) | NS  | 1.236 (0.80-1.90)                                    | NS  | 1.374 (0.98-1.93) | NS  | 0.908 (0.62-1.34)                             | NS  | 0.851 (0.61-1.18) | NS  | 1.091 (0.76-1.57)                                 | NS  | 1.172 (0.83-1.65) | NS  |
| Belgium                     | 378   | 0.730 (0.59-0.91)                               | **  | 1.107 (0.86-1.42) | NS  | 0.527 (0.34-0.82)                                    | **  | 0.535 (0.39-0.74) | *** | 1.157 (0.88-1.52)                             | NS  | 0.981 (0.77-1.25) | NS  | 0.902 (0.67-1.21)                                 | NS  | 0.805 (0.61-1.07) | NS  |
| Brazil                      | 213   | 0.736 (0.55-                                    | *   | 1.591 (1.18-      | **  | 1.141 (0.72-                                         | NS  | 1.048 (0.73-      | NS  | 0.719 (0.47-                                  | NS  | 0.954 (0.69-      | NS  | 1.149 (0.80-                                      | NS  | 1.014 (0.71-      | NS  |

|          |     |  |                   |    |                   |     |                   |    |                   |     |                   |    |                   |     |                   |    |                   |    |
|----------|-----|--|-------------------|----|-------------------|-----|-------------------|----|-------------------|-----|-------------------|----|-------------------|-----|-------------------|----|-------------------|----|
|          |     |  | 0.98)             |    | 2.16)             |     | 1.81)             |    | 1.51)             |     | 1.09)             |    | 1.31)             |     | 1.65)             |    | 1.45)             |    |
| Portugal | 237 |  | 0.652 (0.50-0.86) | ** | 0.747 (.53-1.05)  | NS  | 0.965 (0.60-1.55) | NS | 0.573 (0.37-0.88) | *   | 0.538 (0.35-0.84) | ** | 0.388 (0.26-0.58) | *** | 0.820 (0.56-1.20) | NS | 0.513 (0.34-0.78) | ** |
| Sweden   | 312 |  | 1.131 (0.89-1.43) | NS | 2.656 (2.09-3.38) | *** | 0.423 (0.25-0.72) | ** | 0.344 (0.22-0.53) | *** | 0.895 (0.65-1.24) | NS | 0.566 (0.42-0.77) | *** | 1.077 (0.78-1.49) | NS | 0.905 (0.66-1.24) | NS |
| Ireland  | 230 |  | 0.881 (0.67-1.16) | NS | 1.362 (1.01-1.84) | *   | 0.776 (0.49-1.22) | NS | 0.721 (0.50-1.03) | NS  | 0.784 (0.54-1.15) | NS | 0.684 (0.49-0.95) | *   | 0.930 (0.65-1.33) | NS | 0.781 (0.55-1.11) | NS |

AOR, adjusted odds ratio; CI, confidence interval; NS, not significant.

\*p<0.05, \*\*p<0.01, \*\*\*p<0.001.

<sup>¶</sup>Country variable was included in the logistic regression model for Table 5 and has been included in separate supplementary table due to space restrictions.

<sup>€</sup>Emotions from drinking respondents reported regardless of the type of alcohol they associate it with. Includes emotions associated with spirits, white wine, red wine and beer.

<sup>†</sup>Respondents reported which drink type they mostly drank when at home and when out.

<sup>‡</sup>Reference category
